# Supplementary material for: The importance of muscle mass in predicting intradialytic hypotension in patients undergoing maintenance hemodialysis
Source: PubMed Central journal article supplement — Kidney Res Clin Pract. 2022 Mar 16;41(5):611–22. doi: 10.23876/j.krcp.21.153 (PMC9576459; doi:10.23876/j.krcp.21.153), 2022-03-16
Supplement: j-krcp-21-153suppl1.pdf [file j-krcp-21-153suppl1.pdf]

**Supplementary Table 1.** Baseline characteristics in patients divided into tertiles according to the ratio of SMM (kg) to WT (kg)

| Characteristic                             | Total (n = 177)   | Percentage of SMM to WT |                   |                   | p-value |
|--------------------------------------------|-------------------|-------------------------|-------------------|-------------------|---------|
|                                            |                   | Low (n = 59)            | Middle (n = 59)   | High (n = 59)     |         |
| Age (yr)                                   | 59.5 ± 14.5       | 64.0 ± 13.1             | 62.4 ± 13.3       | 52.1 ± 14.3       | <0.001  |
| Male sex                                   | 87 (49.2)         | 9 (15.3)                | 40 (67.8)         | 38 (64.4)         | <0.001  |
| Weight (kg)                                | 59.3 ± 11.0       | 59.7 ± 12.0             | 61.0 ± 11.4       | 57.3 ± 9.3        |         |
| Height (cm)                                | 161.8 ± 8.6       | 156.4 ± 6.6             | 163.2 ± 8.4       | 165.9 ± 7.8       |         |
| Body mass index (kg/m <sup>2</sup> )       | 22.5 ± 3.3        | 24.2 ± 3.7              | 22.7 ± 2.8        | 20.6 ± 2.2        |         |
| Duration of hemodialysis (yr)              | 5.5 ± 4.3         | 4.9 ± 3.7               | 5.1 ± 3.6         | 6.4 ± 5.2         | 0.14    |
| Etiology of ESRD                           |                   |                         |                   |                   | 0.12    |
| Diabetes mellitus                          | 66 (37.3)         | 28 (47.5)               | 26 (44.1)         | 12 (20.3)         |         |
| Hypertension                               | 28 (15.8)         | 9 (15.3)                | 9 (15.3)          | 10 (16.9)         |         |
| Glomerulonephritis                         | 35 (19.8)         | 8 (13.6)                | 10 (16.9)         | 17 (28.8)         |         |
| Others                                     | 24 (13.6)         | 6 (10.2)                | 8 (13.6)          | 10 (16.9)         |         |
| Unknown                                    | 24 (13.6)         | 8 (13.6)                | 6 (10.2)          | 10 (16.9)         |         |
| Hypertension                               | 150 (84.7)        | 52 (88.1)               | 46 (78.0)         | 52 (88.1)         | 0.21    |
| Diabetes mellitus                          | 81 (45.8)         | 33 (55.9)               | 30 (50.8)         | 18 (30.5)         | 0.01    |
| Ischemic heart disease                     | 35 (19.8)         | 18 (30.5)               | 14 (23.7)         | 3 (5.1)           | 0.002   |
| Chronic heart failure                      | 15 (8.5)          | 7 (11.9)                | 5 (8.5)           | 3 (5.1)           | 0.42    |
| Stroke                                     | 19 (10.7)         | 10 (16.9)               | 7 (11.9)          | 2 (3.4)           | 0.06    |
| Peripheral arterial occlusive disease      | 10 (5.6)          | 6 (10.2)                | 3 (5.1)           | 1 (1.7)           | 0.13    |
| NT-proBNP (pg/mL)                          | 9,359.3 ± 9,705.2 | 10,197.5 ± 10,084.9     | 8,101.4 ± 9,080.8 | 9,779.2 ± 9,957.5 | <0.001  |
| Cardiac index (%)                          | 51.7 ± 6.9        | 53.8 ± 6.6              | 50.6 ± 6.3        | 50.8 ± 7.3        | <0.001  |
| Hemoglobin (g/dL)                          | 10.4 ± 0.9        | 10.4 ± 1.0              | 10.5 ± 1.0        | 10.3 ± 0.9        | 0.18    |
| Blood urine nitrogen (mg/dL)               | 61.0 ± 15.8       | 58.5 ± 15.1             | 59.8 ± 15.4       | 64.5 ± 16.3       | <0.001  |
| Creatinine (mg/dL)                         | 9.9 ± 3.0         | 8.5 ± 2.6               | 9.9 ± 2.5         | 11.3 ± 3.3        | <0.001  |
| Calcium (mg/dL)                            | 9.0 ± 0.6         | 9.0 ± 0.7               | 8.9 ± 0.5         | 9.1 ± 0.6         | 0.6     |
| Sodium (mEq/L)                             | 137.5 ± 3.3       | 136.8 ± 3.5             | 137.8 ± 3.4       | 137.9 ± 2.8       | 0.093   |
| Phosphate (mg/dL)                          | 5.2 ± 1.5         | 5.1 ± 1.6               | 5.1 ± 1.4         | 5.3 ± 1.5         | <0.001  |
| Albumin (g/dL)                             | 3.9 ± 0.4         | 3.9 ± 0.4               | 3.9 ± 0.3         | 4.0 ± 0.5         | 0.08    |
| Total cholesterol (mg/dL)                  | 148.4 ± 33.7      | 160.5 ± 35.2            | 136.8 ± 26.9      | 147.8 ± 34.6      | 0.14    |
| Low-density lipoprotein (mg/dL)            | 86.4 ± 72.6       | 84.5 ± 28.6             | 93.2 ± 108.7      | 78.0 ± 31.2       | 0.64    |
| Iron (ng/mL)                               | 65.8 ± 31.0       | 58.4 ± 26.0             | 71.2 ± 35.3       | 67.6 ± 30.1       | 0.08    |
| TIBC (µg/dL)                               | 229.3 ± 46.9      | 233.6 ± 43.7            | 227.7 ± 47.7      | 226.6 ± 49.4      | <0.001  |
| Ferritin (ng/mL)                           | 245.3 ± 395.3     | 238.3 ± 230.8           | 218.3 ± 194.8     | 279.2 ± 617.3     | 0.74    |
| Potassium (mEq/L)                          | 5.4 ± 1.0         | 5.3 ± 1.0               | 5.4 ± 0.9         | 5.5 ± 1.0         | 0.02    |
| Parathyroid hormone (pg/mL)                | 254.5 ± 206.0     | 204.1 ± 194.2           | 247.2 ± 179.3     | 312.1 ± 230.0     | 0.69    |
| Ultrafiltration per weight (%)             | 4.5 ± 1.7         | 4.4 ± 1.6               | 4.3 ± 1.6         | 4.9 ± 1.9         | <0.001  |
| spKt/V                                     | 1.6 ± 0.3         | 1.7 ± 0.4               | 1.6 ± 0.3         | 1.6 ± 0.3         | 0.7     |
| PG-SGA                                     | 3.7 ± 4.4         | 4.7 ± 5.4               | 4.0 ± 4.2         | 2.4 ± 3.1         | 0.02    |
| Tilburg frailty score                      | 3.5 ± 2.5         | 4.3 ± 2.8               | 3.3 ± 2.5         | 2.9 ± 2.1         | 0.34    |
| Triceps skinfold thickness (mm)            | 17.8 ± 7.9        | 19.5 ± 7.3              | 18.7 ± 8.6        | 15.3 ± 7.2        | 0.02    |
| Mid-arm muscle circumference (cm)          | 26.3 ± 3.2        | 26.9 ± 3.6              | 26.5 ± 2.9        | 25.5 ± 3.0        | 0.1     |
| Handgrip strength (kgf)                    | 21.1 ± 10.3       | 15.0 ± 7.9              | 22.2 ± 8.8        | 26.1 ± 10.9       | 0.006   |
| Percentage of SMM to WT (%)                | 38.9 ± 5.8        | 32.6 ± 3.0              | 38.8 ± 1.8        | 45.3 ± 2.6        | <0.001  |
| SMM to squared height (kg/m <sup>2</sup> ) | 8.7 ± 1.2         | 7.8 ± 1.0               | 8.8 ± 1.0         | 9.3 ± 1.1         | <0.001  |
| Possible sarcopenia <sup>a</sup>           | 113 (63.8)        | 47 (79.7)               | 37 (62.7)         | 29 (49.2)         | 0.001   |
| Sarcopenia <sup>b</sup>                    | 4 (2.3)           | 2 (3.4)                 | 2 (3.4)           | 0 (0.0)           | 0.36    |

(Continued to the next page)

**Supplementary Table 1. Continued**

| Characteristic                            | Total (n = 177) | Percentage of SMM to WT |                 |               | p-value |
|-------------------------------------------|-----------------|-------------------------|-----------------|---------------|---------|
|                                           |                 | Low (n = 59)            | Middle (n = 59) | High (n = 59) |         |
| Extracellular water to TBW (%)            | 39.4 ± 1.5      | 40.0 ± 1.4              | 39.4 ± 1.3      | 38.9 ± 1.5    | 0.009   |
| Intracellular water to TBW (%)            | 60.6 ± 1.5      | 59.9 ± 1.4              | 60.6 ± 1.3      | 61.1 ± 1.5    | 0.06    |
| Phase angle at 50 kHz (°)                 | 4.9 ± 1.2       | 4.4 ± 1.1               | 4.9 ± 1.1       | 5.4 ± 1.3     | <0.001  |
| Medication prescription                   |                 |                         |                 |               |         |
| Antihypertensive                          | 132 (74.6)      | 42 (71.2)               | 47 (79.7)       | 43 (72.9)     | 0.54    |
| Number of medications <sup>c</sup>        |                 |                         |                 |               | 0.47    |
| 1–2                                       | 91 (51.4)       | 32 (54.2)               | 31 (52.5)       | 28 (47.5)     |         |
| ≥3                                        | 41 (23.2)       | 10 (16.9)               | 16 (27.1)       | 15 (25.4)     |         |
| Beta blocker                              | 110 (62.1)      | 34 (57.6)               | 37 (62.7)       | 39 (66.1)     | 0.63    |
| ACE inhibitor                             | 37 (20.9)       | 10 (16.9)               | 17 (28.8)       | 10 (16.9)     | 0.19    |
| ARB                                       | 105 (59.3)      | 32 (54.2)               | 33 (55.9)       | 40 (67.8)     | 0.26    |
| Diuretics                                 | 37 (20.9)       | 10 (16.9)               | 16 (27.1)       | 11 (18.6)     | 0.35    |
| Calcium-channel blocker                   | 35 (19.8)       | 9 (15.3)                | 16 (27.1)       | 10 (16.9)     | 0.22    |
| Alpha-blockers                            | 42 (23.7)       | 9 (15.3)                | 19 (32.2)       | 14 (23.7)     | 0.1     |
| Vasodilators                              | 37 (20.9)       | 9 (15.3)                | 17 (28.8)       | 11 (18.6)     | 0.17    |
| Total prescribed medications <sup>d</sup> | 2.4 ± 2.7       | 1.7 ± 1.9               | 1.9 ± 2.0       | 3.4 ± 3.4     | 0.002   |

Data are presented as mean ± standard deviation, number (%), or number only.

Cutoff values to classify sarcopenia followed the criteria of the Asian Working Group.

ACE, angiotensin-converting enzyme; ARB, angiotensin receptor blocker; ESRD, end-stage renal disease; NT-proBNP, N-terminal prohormone of brain natriuretic peptide; SMM, skeletal muscle mass; spKt/V, single-pool ratio of urea clearance multiplied by dialysis time to volume; PG-SGA, patient-generated subjective global assessment; TBW, total body water; TIBC, total iron binding capacity; WT, dry body weight.

<sup>a</sup>Possible sarcopenia was defined as low handgrip strength (<28 kg·f in males and <18 kg·f in females). <sup>b</sup>Sarcopenia was defined as both low handgrip strength (<28 kg·f in males and <18 kg·f in females) and low ratio of SMM to squared height (<7.0 kg/m<sup>2</sup> in males and <5.7 kg/m<sup>2</sup> in females). <sup>c</sup>Number of medications refers to the individual medications prescribed. <sup>d</sup>The total prescribed medications are the total equivalent dosages.
