# Supplementary material for: The importance of muscle mass in predicting intradialytic hypotension in patients undergoing maintenance hemodialysis
Source: PubMed Central journal article supplement — Kidney Res Clin Pract. 2022 Mar 16;41(5):611–22. doi: 10.23876/j.krcp.21.153 (PMC9576459; doi:10.23876/j.krcp.21.153), 2022-03-16
Supplement: j-krcp-21-153suppl2.pdf [file j-krcp-21-153suppl2.pdf]

**Supplementary Table 2.** OR of covariates to intradialytic hypotension including tertile groups by the ratio of SMM (kg) to WT (kg) in the multivariable logistic model

| Variable                                               | OR (95% CI)       | p-value |
|--------------------------------------------------------|-------------------|---------|
| SMM/WT                                                 |                   |         |
| Middle SMM/WT (vs. low SMM/WT)                         | 0.30 (0.98–0.88)  | 0.03    |
| High SMM/WT (vs. low SMM/WT)                           | 0.06 (0.01–0.29)  | 0.001   |
| Age                                                    | 1.00 (0.97–1.05)  | 0.81    |
| Male sex (vs. female)                                  | 0.87 (0.30–2.49)  | 0.79    |
| DM (vs. non-DM)                                        | 5.00 (1.95–12.80) | 0.001   |
| Cardiovascular comorbidities <sup>a</sup> (yes vs. no) | 1.81 (0.72–4.54)  | 0.21    |
| Cardiac index                                          | 0.96 (0.89–1.04)  | 0.33    |
| Ultrafiltration per weight                             | 1.70 (1.22–2.35)  | 0.002   |

CI, confidence interval; DM, diabetes mellitus; OR, odds ratio; SMM, skeletal muscle mass; SMM/WT, percentage of SMM to WT; WT, dry body weight.

<sup>a</sup>Cardiovascular comorbidities include chronic heart failure or ischemic heart disease.
