# Supplementary material for: The importance of muscle mass in predicting intradialytic hypotension in patients undergoing maintenance hemodialysis
Source: PubMed Central journal article supplement — Kidney Res Clin Pract. 2022 Mar 16;41(5):611–22. doi: 10.23876/j.krcp.21.153 (PMC9576459; doi:10.23876/j.krcp.21.153), 2022-03-16
Supplement: j-krcp-21-153suppl3.pdf [file j-krcp-21-153suppl3.pdf]

**Supplementary Table 3. Multivariable analysis of factors associated with IDH**

| Variable                                                                  | OR (95% CI)        |
|---------------------------------------------------------------------------|--------------------|
| SMM/WT (%) plus HGS (kgf) (vs. SMM/WT, $\geq 36.0$ and HGS, $\geq 19.0$ ) |                    |
| SMM/WT, $< 36.0$ and HGS, $\geq 19.0$                                     | 6.83 (1.41–33.16)  |
| SMM/WT, $\geq 36.0$ and HGS, $< 19.0$                                     | 3.55 (0.92–13.73)  |
| SMM/WT, $< 6.0$ and HGS, $< 19.0$                                         | 16.72 (3.40–82.35) |
| Age                                                                       | 1.00 (0.96–1.04)   |
| Male sex (vs. female)                                                     | 1.44 (0.44–4.73)   |
| DM (vs. non-DM)                                                           | 5.69 (2.20–14.68)  |
| Cardiovascular comorbidities <sup>a</sup> (yes vs. no)                    | 2.20 (0.87–5.54)   |
| Cardiac index                                                             | 0.95 (0.88–1.03)   |
| Ultrafiltration per weight                                                | 1.62 (1.19–2.21)   |

To classify SMM/WT and HGS, we used the highest value in the low-SMM/WT tertile (36.0%) and the median value of HGS (19.0 kgf). Either low SMM/WT ( $< 36.0\%$ ) or low HGS ( $< 19.0$  kgf) was related to higher odds of intradialytic hypotension than was SMM/WT of  $\geq 36.0\%$  and HGS of  $\geq 19.0$  kgf. ORs of variables to IDH after multivariable adjustment, including the variable indicating the ratio of SMM (kg) to WT (kg) divided by the highest value in the low tertile (36.0%) and HGS divided by the median value (19.0 kgf), were shown.

CI, confidence interval; DM, diabetes mellitus; HGS, handgrip strength; IDH, intradialytic hypotension; OR, odds ratio; SMM, skeletal muscle mass; SMM/WT, percentage of SMM to WT; WT, dry body weight.

<sup>a</sup>Cardiovascular comorbidities were chronic heart failure or ischemic heart disease.
