# Supplementary material for: The importance of muscle mass in predicting intradialytic hypotension in patients undergoing maintenance hemodialysis
Source: PubMed Central journal article supplement — Kidney Res Clin Pract. 2022 Mar 16;41(5):611–22. doi: 10.23876/j.krcp.21.153 (PMC9576459; doi:10.23876/j.krcp.21.153), 2022-03-16
Supplement: j-krcp-21-153suppl5.pdf [file j-krcp-21-153suppl5.pdf]

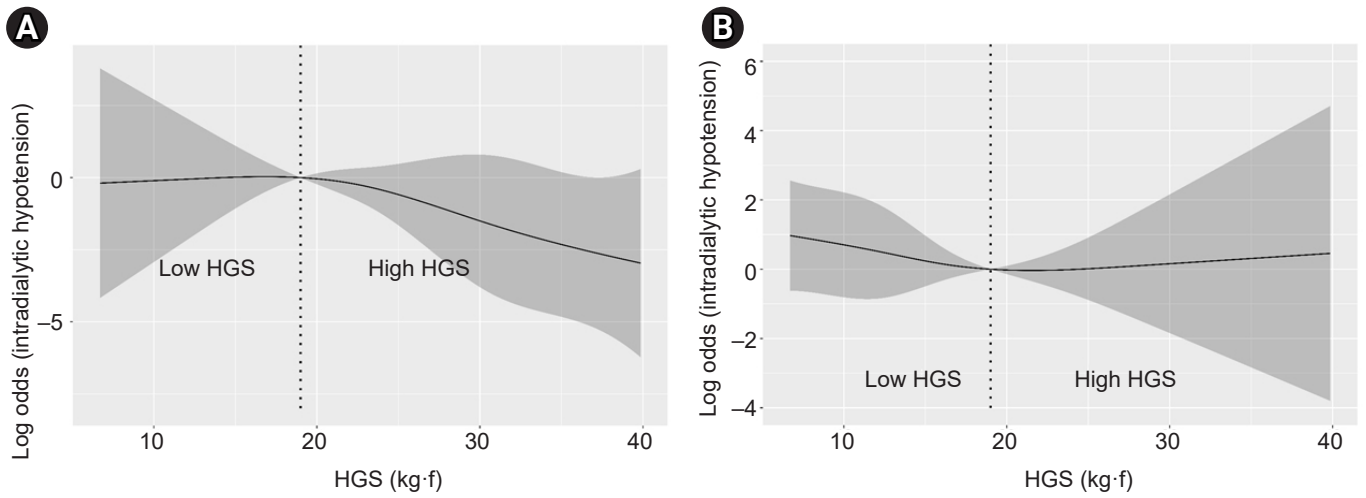

**Supplementary Figure 1. Restricted cubic spline curve of odds according to the change of HGS (kg·f) in males (A) and in females (B).**

In males, the odds of intradialytic hypotension decreased when HGS was greater than 19.0 kg·f. The odds of intradialytic hypotension in females increased when HGS was less than 19.0 kg·f. The dotted line indicates a value of 19.0 kg·f.

HGS, handgrip strength.
